# Supplementary material for: A new metabolomic assay to examine inflammation and redox pathways following LPS challenge
Source: PubMed Central journal article supplement (PMC3507808; doi:10.1186/1476-9255-9-37), 2012-10-04

**A**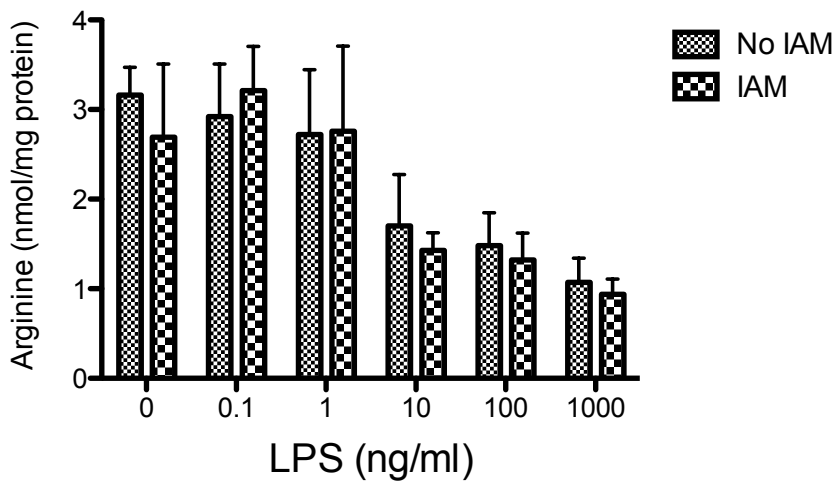**B**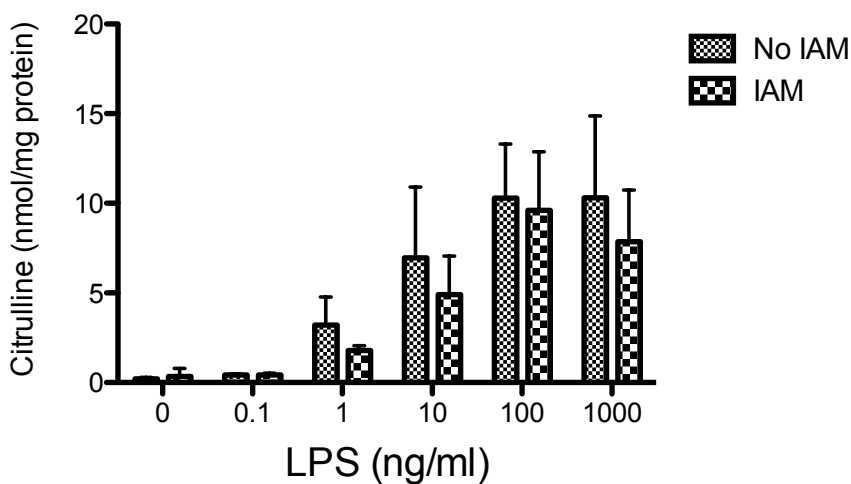**C**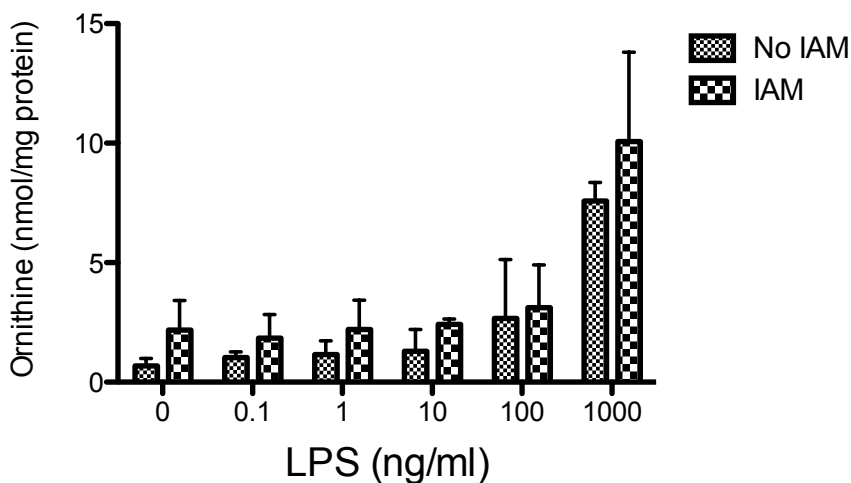

Supplement: 1476-9255-9-37-S2.pdf [file 1476-9255-9-37-S2.pdf]
